# Supplementary material for: Nitrate radical generation via continuous generation of dinitrogen pentoxide in a laminar flow reactor coupled to an oxidation flow reactor
Source: Copernicus journal article supplement (doi:10.5194/amt-13-2397-2020), 2020-05-15
Supplement: Supplementary file 1 [file Lambe-NO3-OFRs_v4_supplement.pdf › Lambe-NO3-OFRs_v4_supplement.pdf]

# Nitrate radical generation via continuous generation of dinitrogen pentoxide in a laminar flow reactor coupled to an oxidation flow reactor

Andrew T. Lambe<sup>1</sup>, Ezra C. Wood<sup>2</sup>, Jordan E. Krechmer<sup>1</sup>, Francesca Majluf<sup>1</sup>, Leah R. Williams<sup>1</sup>, Philip L. Croteau<sup>1</sup>, Manuela Cirtog<sup>3</sup>, Anaïs Féron<sup>3</sup>, Jean-Eudes Petit<sup>4</sup>, Alexandre Albinet<sup>5</sup>, Jose L. Jimenez<sup>6</sup>, and Zhe Peng<sup>6</sup>

<sup>1</sup>Center for Aerosol and Cloud Chemistry, Aerodyne Research Inc., Billerica, MA, USA

<sup>2</sup>Dept. of Chemistry, Drexel University, Philadelphia, PA, USA

<sup>3</sup>Laboratoire Inter-Universitaire des Systèmes Atmosphériques (LISA), UMR CNRS 7583, Université Paris-Est-Créteil, Université de Paris, Institut Pierre Simon Laplace (IPSL), Créteil, France

<sup>4</sup>Laboratoire des Sciences du Climat et de l'Environnement (CNRS-CEA-UVSQ), CEA Orme des Merisiers, Gif-sur-Yvette, France

<sup>5</sup>Institut National de l'Environnement Industriel et des Risques (Ineris), Verneuil-en-Halatte, France

<sup>6</sup>Dept. of Chemistry and Cooperative Institute for Research in Environmental Sciences (CIRES), University of Colorado, Boulder, CO, USA

**Correspondence:** Andrew T. Lambe (lambe@aerodyne.com), Zhe Peng (zhe.peng@colorado.edu)

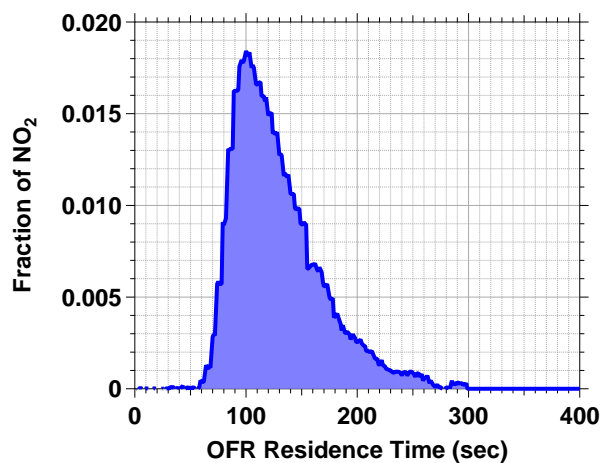

**Figure S1.** Residence time distribution of 10 s pulsed inputs of NO<sub>2</sub> injected into the Potential Aerosol Mass OFR obtained with lights off and 6.5 L min<sup>-1</sup> flow through the reactor.

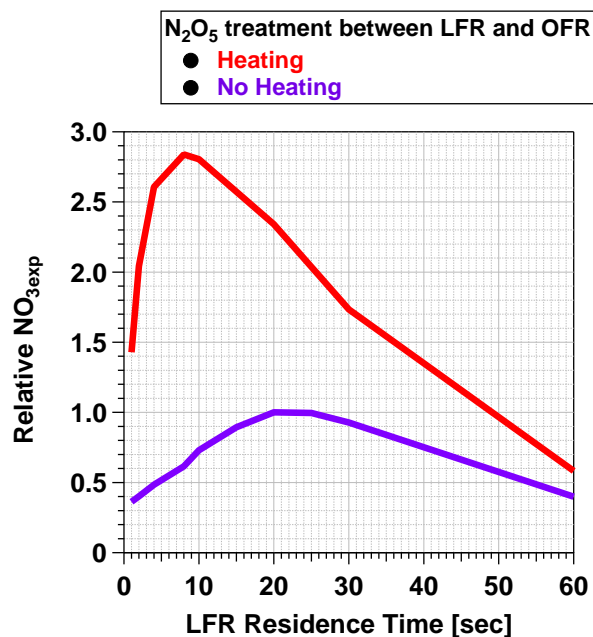

**Figure S2.** Model simulations of the relative NO<sub>3exp</sub> achieved in the OFR following injection of 300 ppm O<sub>3</sub> and NO<sub>2</sub> into the LFR as a function of  $\tau_{LFR}$  ranging from 1 to 60 s. Purple and red lines represent modeling cases corresponding to 0% (“no heating”) and 100% (“heating”) thermal dissociation of N<sub>2</sub>O<sub>5</sub> between the LFR and OFR.

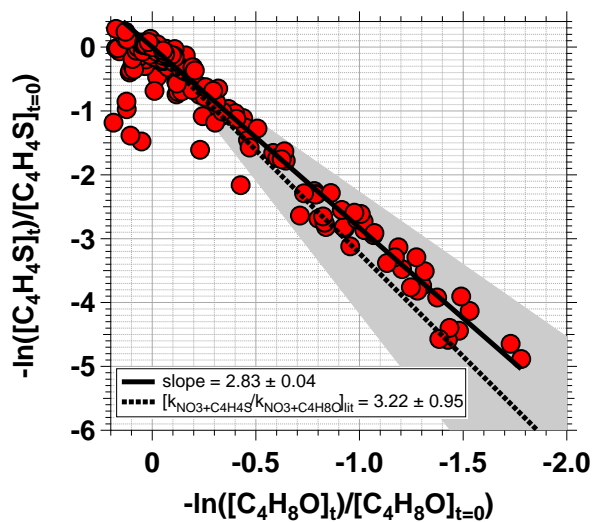

**Figure S3.** Relative rate constant obtained from PTR-MS measurements of butanal ( $C_4H_8O$ ) and thiophene ( $C_4H_4S$ ) tracers used in OFR- $iN_2O_5$  characterization studies. Literature relative rate constant obtained from kinetic data published by Atkinson (1991) and D’Anna et al. (2001).

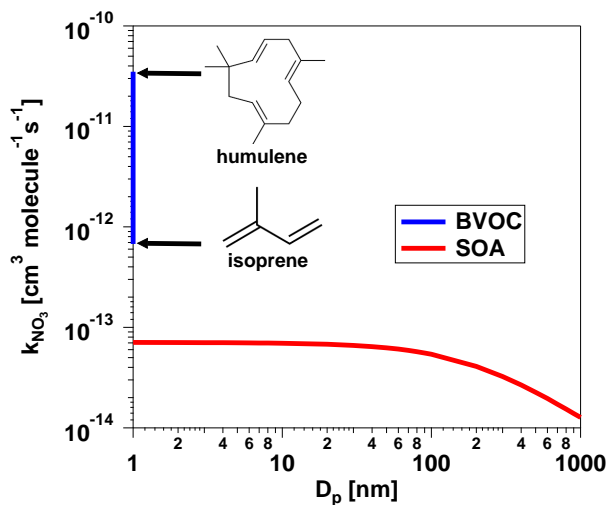

**Figure S4.** Effective rate constant between  $NO_3$  and SOA particles ( $k_{NO_3}$ ) calculated using Eq. 6 assuming  $\rho_p = 1.4 \text{ g cm}^{-3}$ ,  $M_{SOA} = 250 \text{ g mol}^{-1}$  and  $\gamma = 0.1$ .

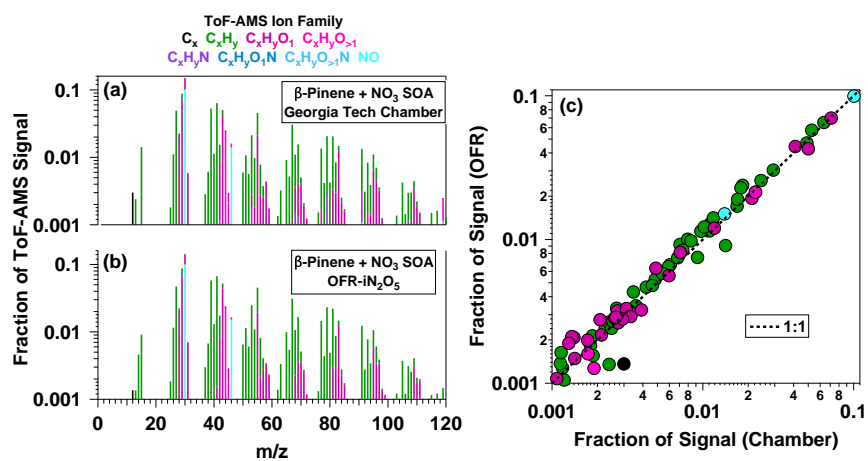

**Figure S5.** Logarithmically scaled AMS spectra of SOA generated from NO<sub>3</sub> oxidation of  $\beta$ -pinene in the (a) Georgia Tech environmental chamber (Boyd et al., 2015) and (b) OFR. Scatter plot in (c) shows spectra generated in the OFR and chamber plotted against each other.

**Table S1.** VOC tracers used in OFR-iN<sub>2</sub>O<sub>5</sub> characterization studies. Bimolecular rate coefficients for reaction with NO<sub>3</sub> and O<sub>3</sub> are given in units of cm<sup>3</sup> molecule<sup>-1</sup> s<sup>-1</sup>.

| Compound                   | Formula                          | Structure                                                                           | k <sub>NO<sub>3</sub></sub>                | k <sub>O<sub>3</sub></sub> | References |
|----------------------------|----------------------------------|-------------------------------------------------------------------------------------|--------------------------------------------|----------------------------|------------|
| Acetonitrile               | C <sub>2</sub> H <sub>3</sub> N  |    | <3.01×10 <sup>-19</sup>                    | N/A                        | 1          |
| Toluene                    | C <sub>7</sub> H <sub>8</sub>    |    | 6.79×10 <sup>-17</sup>                     | 3.90×10 <sup>-22</sup>     | 2,3        |
| o-Xylene                   | C <sub>8</sub> H <sub>10</sub>   |    | 3.77×10 <sup>-16</sup>                     | 1.72×10 <sup>-21</sup>     | 2,3        |
| p-Cymene                   | C <sub>10</sub> H <sub>14</sub>  |    | 1.00×10 <sup>-15</sup>                     | <5.00×10 <sup>-20</sup>    | 2,4        |
| 1,2,4-Trimethylbenzene     | C <sub>9</sub> H <sub>12</sub>   |    | 1.81×10 <sup>-15</sup>                     | <1.3×10 <sup>-21</sup>     | 2          |
| Butanol                    | C <sub>4</sub> H <sub>10</sub> O |    | <2.71×10 <sup>-15</sup>                    | N/A                        | 5          |
| Benzaldehyde               | C <sub>7</sub> H <sub>6</sub> O  |  | 4.3×10 <sup>-15</sup>                      | <2.00×10 <sup>-19</sup>    | 2,6        |
| Butanal                    | C <sub>4</sub> H <sub>8</sub> O  |  | 1.22×10 <sup>-14</sup>                     | N/A                        | 7          |
| Thiophene                  | C <sub>4</sub> H <sub>4</sub> S  |  | 3.94×10 <sup>-14</sup>                     | 5.99×10 <sup>-20</sup>     | 2,8        |
| 2,3-Dihydrobenzofuran      | C <sub>8</sub> H <sub>8</sub> O  |  | 1.15×10 <sup>-13</sup>                     | <1.00×10 <sup>-19</sup>    | 2,9        |
| Naphthalene-d <sub>8</sub> | C <sub>10</sub> D <sub>8</sub>   |  | 4.76×10 <sup>-28</sup> ×[NO <sub>2</sub> ] | N/A                        | 2          |

<sup>1</sup>Cantrell et al. (1987); <sup>2</sup>Atkinson (1991); <sup>3</sup>Toby et al. (1985); <sup>4</sup>Atkinson et al. (1990); <sup>5</sup>Chew et al. (1998);

<sup>6</sup>Bernard et al. (2013); <sup>7</sup>D'Anna et al. (2001); <sup>8</sup>Atkinson et al. (1983); <sup>9</sup>Atkinson et al. (1992)

**Table S2.** KinSim mechanism used to model  $\text{NO}_3$  and  $\text{N}_2\text{O}_5$  formation and destruction in the LFR and OFR. Kinetic data is adapted from mechanism published in Palm et al. (2017) and references therein.

| Reactant 1             | Reactant 2           | Product 1                     | Product 2      | Product 3    | $A_\infty$  | $E_\infty$ | $n_\infty$ | $A_0$   | $E_0$ | $n_0$ |
|------------------------|----------------------|-------------------------------|----------------|--------------|-------------|------------|------------|---------|-------|-------|
| NO                     | $\text{O}_3$         | $\text{NO}_2$                 | $\text{O}_2$   |              | 3E-12       | 1500       | 0          | 0       | 0     | 0     |
| $\text{NO}_2$          | $\text{O}_3$         | $\text{NO}_3$                 | $\text{O}_2$   |              | 1.2E-13     | 2450       | 0          | 0       | 0     | 0     |
| $\text{NO}_3$          | $\text{NO}_3$        | $\text{NO}_2$                 | $\text{NO}_2$  | $\text{O}_2$ | 8.5E-13     | 2450       | 0          | 0       | 0     | 0     |
| $\text{N}_2\text{O}_5$ | $\text{H}_2\text{O}$ | $\text{HNO}_3$                | $\text{HNO}_3$ |              | 1E-22       | 0          | 0          | 0       | 0     | 0     |
| $\text{NO}_2$          | $\text{NO}_3$        | $\text{N}_2\text{O}_5$        |                |              | 1.9E-12     | 0          | -0.2       | 3.6E-30 | 0     | 4.1   |
| $\text{N}_2\text{O}_5$ |                      | $\text{NO}_2$                 | $\text{NO}_3$  |              | 9.7E+14     | 11080      | -0.1       | 0.0013  | 11000 | 3.5   |
| NO                     | $\text{NO}_3$        | $\text{NO}_2$                 | $\text{NO}_2$  |              | 1.8E-11     | -110       | 0          | 0       | 0     | 0     |
| $\text{NO}_2$          | $\text{NO}_3$        | NO                            | $\text{NO}_2$  | $\text{O}_2$ | 4.5E-14     | 1260       | 0          | 0       | 0     | 0     |
| $\text{NO}_3$          | wall1                | wall1- $\text{NO}_3$          |                |              | 0.02 - 0.15 | 0          | 0          | 0       | 0     | 0     |
| $\text{N}_2\text{O}_5$ | wall2                | wall2- $\text{N}_2\text{O}_5$ |                |              | 0.01 - 0.08 | 0          | 0          | 0       | 0     | 0     |

**Table S3.** Sensitivity analysis of the effect of varying  $k_{\text{wLFR},\text{NO}_3}$  on  $\text{NO}_{3\text{exp}}$ . The following inputs to the KinSim mechanism were assumed:  $[\text{NO}_2]_{0,\text{LFR}} = [\text{O}_3]_{0,\text{LFR}} = 300$  ppm,  $T_{\text{LFR}} = T_{\text{OFR}} = 24^\circ\text{C}$ ,  $\text{RH}_{\text{LFR}} = \text{RH}_{\text{OFR}} = 1\%$ ,  $k_{\text{wLFR},\text{N}_2\text{O}_5} = 0.1 \text{ s}^{-1}$ ,  $k_{\text{wOFR},\text{N}_2\text{O}_5} = 0.014 \text{ s}^{-1}$ ,  $\tau_{\text{LFR}} = 20 \text{ s}$ ,  $\tau_{\text{OFR}} = 120 \text{ s}$ , dilution factor = 4.4 between LFR and OFR.

| $k_{\text{wLFR},\text{NO}_3} [\text{s}^{-1}]$ | $\text{NO}_{3\text{exp}} [\text{molecules cm}^{-3} \text{ s}]$ | Normalized $\text{NO}_{3\text{exp}}$ |
|-----------------------------------------------|----------------------------------------------------------------|--------------------------------------|
| 0                                             | $1.277 \times 10^{14}$                                         | 1                                    |
| 0.1                                           | $1.275 \times 10^{14}$                                         | 0.9984                               |
| 0.2                                           | $1.273 \times 10^{14}$                                         | 0.9969                               |
| 0.3                                           | $1.272 \times 10^{14}$                                         | 0.9965                               |

**Table S4.** KinSim mechanism used to model destruction of alkyl and acyl organic peroxy radicals formed from VOC + NO<sub>3</sub> reactions in the OFR. Kinetic data is adapted from (Orlando and Tyndall, 2012).

| Reactant 1  | Reactant 2      | Product 1   | Product 2 | Product 3 | A <sub>∞</sub> | E <sub>∞</sub> | n <sub>∞</sub> | A <sub>0</sub> | E <sub>0</sub> | n <sub>0</sub> |
|-------------|-----------------|-------------|-----------|-----------|----------------|----------------|----------------|----------------|----------------|----------------|
| VOC         | NO <sub>3</sub> | alkylRO2    |           |           | 0 or 2.5E-12   | 0              | 0              | 0              | 0              | 0              |
| VOC         | NO <sub>3</sub> | acylRO2     |           |           | 2.5E-12 or 0   | 0              | 0              | 0              | 0              | 0              |
| alkylRO2    | NO              |             |           |           | 2.7E-12        | -360           | 0              | 0              | 0              | 0              |
| acylRO2     | NO              |             |           |           | 7.5E-12        | -290           | 0              | 0              | 0              | 0              |
| alkylRO2    | NO2             | alkylRO2NO2 |           |           | 6.1E-12        | 0              | 0              | 1.3E-30        | 6.2            | 0.31           |
| alkylRO2NO2 |                 | alkylRO2    | NO2       |           | 8.8E+15        | 10440          | 0              | 0.00048        | 9285           | 0.31           |
| acylRO2     | NO2             | acylRO2NO2  |           |           | 1.2E-11        | 0              | 0.9            | 2.7E-28        | 7.1            | 0.3            |
| acylRO2NO2  |                 | acylRO2     | NO2       |           | 5.4E+16        | 13830          | 0              | 0.0049         | 12100          | 0.3            |
| alkylRO2    | NO3             | alkylRO     | NO2       |           | 2.4E-12        | 0              | 0              | 0              | 0              | 0              |
| acylRO2     | NO3             | acylRO      | NO2       |           | 3.2E-12        | 0              | 0              | 0              | 0              | 0              |
| alkylRO2    | HO2             |             |           |           | 7.4E-13        | -700           | 0              | 0              | 0              | 0              |
| acylRO2     | HO2             |             |           |           | 5.2E-13        | -980           | 0              | 0              | 0              | 0              |
| alkylRO2    | acylRO2         |             |           |           | 2.2E-12        | -500           | 0              | 0              | 0              | 0              |
| acylRO2     | acylRO2         |             |           |           | 2.9E-12        | -500           | 0              | 0              | 0              | 0              |

**Table S5.** Bimolecular rate coefficients between selected biogenic volatile organic compounds (BVOCs) and NO<sub>3</sub>, and BVOC + NO<sub>3</sub> carbonyl oxidation products and NO<sub>3</sub>. Rate coefficients were obtained from Ng et al. (2017) and references therein, and are given in units of cm<sup>3</sup> molecule<sup>-1</sup> s<sup>-1</sup>.

| BVOC     | k <sub>NO<sub>3</sub></sub> | Oxidation Product   | k <sub>NO<sub>3</sub></sub> |
|----------|-----------------------------|---------------------|-----------------------------|
| isoprene | 6.5 × 10 <sup>-13</sup>     | methyl vinyl ketone | < 6 × 10 <sup>-16</sup>     |
|          |                             | methacrolein        | 3.4 × 10 <sup>-15</sup>     |
| α-pinene | 6.2 × 10 <sup>-12</sup>     | pinonaldehyde       | 2.0 × 10 <sup>-14</sup>     |
| 3-carene | 9.1 × 10 <sup>-12</sup>     | caronaldehyde       | 2.5 × 10 <sup>-14</sup>     |
| sabinene | 1.0 × 10 <sup>-11</sup>     | sabinaketone        | 3.6 × 10 <sup>-16</sup>     |

## References

- Atkinson, R.: Kinetics and Mechanisms of the Gas-Phase Reactions of the NO<sub>3</sub> Radical with Organic Compounds, *Journal of Physical and Chemical Reference Data*, 20, 459–507, <https://doi.org/http://dx.doi.org/10.1063/1.555887>, 1991.
- Atkinson, R., Aschmann, S. M., and Carter, W. P. L.: Kinetics of the reactions of O<sub>3</sub> and OH radicals with furan and thiophene at 298 ± 2 K, *International Journal of Chemical Kinetics*, 15, 51–61, <https://doi.org/10.1002/kin.550150106>, <https://onlinelibrary.wiley.com/doi/abs/10.1002/kin.550150106>, 1983.
- Atkinson, R., Arey, J., Zielinska, B., and Aschmann, S. M.: Kinetics and nitro-products of the gas-phase OH and NO<sub>3</sub> radical-initiated reactions of naphthalene-d<sub>8</sub>, fluoranthene-d<sub>10</sub>, and pyrene, *International Journal of Chemical Kinetics*, 22, 999–1014, <https://doi.org/10.1002/kin.550220910>, 1990.
- 10 Atkinson, R., Arey, J., Tuazon, E. C., and Aschmann, S. M.: Gas-phase reactions of 1,4-benzodioxan, 2,3-dihydrobenzofuran, and 2,3-benzofuran with OH radicals and O<sub>3</sub>, *International Journal of Chemical Kinetics*, 24, 345–358, <https://doi.org/10.1002/kin.550240404>, <https://onlinelibrary.wiley.com/doi/abs/10.1002/kin.550240404>, 1992.
- Bernard, F., Magneron, I., Eyglunent, G., Daële, V., Wallington, T. J., Hurley, M. D., and Mellouki, A.: Atmospheric Chemistry of Benzyl Alcohol: Kinetics and Mechanism of Reaction with OH Radicals, *Environ. Sci. Technol.*, 47, 3182–3189, <https://doi.org/10.1021/es304600z>, <https://doi.org/10.1021/es304600z>, 2013.
- 15 Boyd, C. M., Sanchez, J., Xu, L., Eugene, A. J., Nah, T., Tuet, W. Y., Guzman, M. I., and Ng, N. L.: Secondary organic aerosol formation from the  $\beta$ -pinene+NO<sub>3</sub> system: effect of humidity and peroxy radical fate, *Atmospheric Chemistry and Physics*, 15, 7497–7522, 2015.
- Cantrell, C. A., Davidson, J. A., Shetter, R. E., Anderson, B. A., and Calvert, J. G.: Reactions of nitrate radical and nitrogen oxide (N<sub>2</sub>O<sub>5</sub>) with molecular species of possible atmospheric interest, *The Journal of Physical Chemistry*, 91, 6017–6021, <https://doi.org/10.1021/j100307a040>, <https://doi.org/10.1021/j100307a040>, 1987.
- 20 Chew, A. A., Atkinson, R., and Aschmann, S. M.: Kinetics of the gas-phase reactions of NO<sub>3</sub> radicals with a series of alcohols, glycol ethers, ethers and chloroalkenes, *J. Chem. Soc., Faraday Trans.*, 94, 1083–1089, <https://doi.org/10.1039/A708183I>, <http://dx.doi.org/10.1039/A708183I>, 1998.
- D'Anna, B., Andresen, Ø., Gefen, Z., and Nielsen, C. J.: Kinetic study of OH and NO<sub>3</sub> radical reactions with 14 aliphatic aldehydes, *Phys. Chem. Chem. Phys.*, 3, 3057–3063, <https://doi.org/10.1039/B103623H>, 2001.
- 25 Ng, N. L., Brown, S. S., Archibald, A. T., Atlas, E., Cohen, R. C., Crowley, J. N., Day, D. A., Donahue, N. M., Fry, J. L., Fuchs, H., Griffin, R. J., Guzman, M. I., Herrmann, H., Hodzic, A., Iinuma, Y., Jimenez, J. L., Kiendler-Scharr, A., Lee, B. H., Luecken, D. J., Mao, J., McLaren, R., Mutzel, A., Osthoff, H. D., Ouyang, B., Picquet-Varrault, B., Platt, U., Pye, H. O. T., Rudich, Y., Schwantes, R. H., Shiraiwa, M., Stutz, J., Thornton, J. A., Tilgner, A., Williams, B. J., and Zaveri, R. A.: Nitrate radicals and biogenic volatile organic compounds: oxidation, mechanisms, and organic aerosol, *Atmospheric Chemistry and Physics*, 17, 2103–2162, <https://doi.org/10.5194/acp-17-2103-2017>, 2017.
- 30 Orlando, J. J. and Tyndall, G. S.: Laboratory studies of organic peroxy radical chemistry: an overview with emphasis on recent issues of atmospheric significance, *Chem. Soc. Rev.*, 41, 6294–6317, <https://doi.org/10.1039/C2CS35166H>, 2012.
- Palm, B. B., Campuzano-Jost, P., Day, D. A., Ortega, A. M., Fry, J. L., Brown, S. S., Zarzana, K. J., Dube, W., Wagner, N. L., Draper, D. C., Kaser, L., Jud, W., Karl, T., Hansel, A., Gutiérrez-Montes, C., and Jimenez, J. L.: Secondary organic aerosol formation from in situ OH, O<sub>3</sub>, and NO<sub>3</sub> oxidation of ambient forest air in an oxidation flow reactor, *Atmospheric Chemistry and Physics*, 17, 5331–5354, <https://doi.org/10.5194/acp-17-5331-2017>, 2017.
- 35



Toby, S., Van de Burgt, L. J., and Toby, F. S.: Kinetics and chemiluminescence of ozone-aromatic reactions in the gas phase, *J. Phys. Chem.*, 89, 1982–1986, <https://doi.org/10.1021/j100256a034>, <https://doi.org/10.1021/j100256a034>, 1985.
