# Supplementary material for: Nitrate radical generation via continuous generation of dinitrogen pentoxide in a laminar flow reactor coupled to an oxidation flow reactor
Source: Copernicus journal article supplement (doi:10.5194/amt-13-2397-2020), 2020-05-15
Supplement: Supplementary file [file amt-13-2397-2020-supplement-title-page.pdf › amt-13-2397-2020-supplement-title-page.pdf]

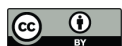

## *Supplement of*

# **Nitrate radical generation via continuous generation of dinitrogen pentoxide in a laminar flow reactor coupled to an oxidation flow reactor**

**Andrew T. Lambe et al.**

*Correspondence to:* Andrew T. Lambe (lambe@aerodyne.com) and Zhe Peng (zhe.peng@colorado.edu)

- amt-13-2397-2020-supplement-title-page.pdf
- LFR-OFR-iN2O5\_KinSim\_Case\_rev1.itx
- Lambe-NO3-OFRs\_v4\_supplement.pdf

The copyright of individual parts of the supplement might differ from the CC BY 4.0 License.
